# Supplementary material for: MeCP2 Governs Maternal Hyperandrogenism-Induced Cortical Defects and Autism-like Behaviors via Noncanonical AR-Dependent Regulation of Mef2c
Source: Research Square preprint supplement (doi:10.21203/rs.3.rs-6731184/v1), 2025-06-12
Supplement: Supplementary file 1 [file 91a2d0aa6d8c88f0b550fea4.xlsx]

## Sheet: Fig. 1
Fig. 1B											TEST level（ng/mL）		male				TEST level（ng/mL）		female
	TEST level（ng/mL）									Fig. 1C	E14.5			E17.5			E14.5			E17.5
	E14.5			E16.5			E18.5				Vehicle	Letrozole		Vehicle	Letrozole		Vehicle	Letrozole		Vehicle	Letrozole
	Vehicle	Letrozole		Vehicle	Letrozole		Vehicle	Letrozole			0.25759	0.26025		0.37189	0.56524		0.12101	1.27585		0.18839	1.18393
	0.37484	0.89291		0.49232	1.67824		0.5578	1.18227			0.07141	0.4724		0.1836	0.96588		0.1582	0.89674		0.17499	0.93832
	0.45333	0.99833		0.38938	0.7983		0.61474	1.73825			0.15924	0.52135		0.15717	0.98295		0.13456	0.59476		0.19783	0.6489
	0.69322	1.36377		0.46313	1.39238		0.37913	1.93796			0.23831	0.43017		0.19384	0.89893		0.09999	0.39862		0.08934	0.3994
	0.62133	1.00823		0.7842	1.18392		0.4636	1.75033			0.36976	0.3599		0.21945	0.43198		0.04007	0.58937		0.10491	0.28494
	0.71983	0.83782		0.58229	1.0423		0.82593	1.48295			0.17334	0.79283		0.13484	0.40912		0.18012	0.98053		0.1493	0.48929
	0.36752	1.44937		0.73827	0.73827		0.42394	1.39389			0.23284	0.98749		0.3293	0.51421		0.11909	0.694785		0.07393	0.58393
	0.29477	2.48367		0.5898	0.5898		0.53051	1.59033			0.48934	0.84738		0.13874	0.48107		0.18456	0.39576		0.09933	0.39204
	0.47194	0.93783			1.5738		0.74946	2.03844			0.39849	0.98349					0.1328	0.104855		0.11738	0.48932
	0.29484	1.74893			1.7388		0.59303	1.89302			0.29894	0.83923
	0.73936	1.58939					0.79334	1.47293			0.13849	1.38744
											0.28494	0.58793
	male															female																SATB2+ cells
	SATB2+ cells															SATB2+ cells																male		female
Fig. 1E	bin	Vehicle							Letrozole							bin	Vehicle							Letrozole							Fig. 1F	Vehicle	Letrozole	Vehicle	Letrozole
	1	0	0	0	0	0	0		0	0	0	0	0	0		1	0	0	0	0	0	0		0	0	0	0	0	0			284	374	239	315
	2	0	0	0	0	0	0		0.0106952	0.002849	0.00262467	0.0288248	0.0123762	0.0236559		2	0	0	0	0	0	0		0.0106952	0.002849	0.00262467	0.0288248	0.0123762	0.0236559			231	351	274	289
	3	0.0211268	0.021645	0.0106383	0.0160256	0.0439024	0.015748		0.0294118	0.0541311	0.0551181	0.0532151	0.0668317	0.0494624		3	0.0241935	0.0131004	0	0.0184502	0.0122951	0.0472441		0.0294118	0.0541311	0.0551181	0.0532151	0.0668317	0.0494624			282	381	229	273
	4	0.0176056	0.038961	0.0283688	0.0576923	0.0439024	0.0433071		0.0481283	0.0911681	0.0971129	0.0731707	0.0693069	0.0752688		4	0.0201613	0.0218341	0.0281124	0.0110701	0.0286885	0.0551181		0.0481283	0.0911681	0.0971129	0.0731707	0.0693069	0.0752688			310	320	322	301
	5	0.0422535	0.0606061	0.0638298	0.0865385	0.0390244	0.0433071		0.0828877	0.0997151	0.0997375	0.108647	0.0965347	0.105376		5	0.0443548	0.0174672	0.060241	0.0701107	0.0655738	0.0629921		0.0828877	0.0997151	0.0997375	0.108647	0.0965347	0.105376			221	391	247	314
	6	0.0880282	0.12987	0.117021	0.0929487	0.0926829	0.153543		0.144385	0.136752	0.112861	0.146341	0.0470297	0.131183		6	0.0887097	0.117904	0.140562	0.118081	0.127049	0.0866142		0.144385	0.136752	0.112861	0.146341	0.0470297	0.131183			293	347	234	342
	7	0.112676	0.151515	0.159574	0.157051	0.117073	0.145669		0.141711	0.133903	0.139108	0.0909091	0.155941	0.152688		7	0.137097	0.19214	0.156627	0.143911	0.17623	0.153543		0.141711	0.133903	0.139108	0.0909091	0.155941	0.152688					248	339
	8	0.207746	0.177489	0.198582	0.211538	0.15122	0.188976		0.173797	0.173789	0.199475	0.219512	0.25495	0.154839		8	0.217742	0.235808	0.196787	0.202952	0.237705	0.232283		0.173797	0.173789	0.199475	0.219512	0.25495	0.154839					278	291
	9	0.338028	0.329004	0.304965	0.36859	0.35122	0.287402		0.256684	0.216524	0.238845	0.157428	0.309406	0.195699		9	0.350806	0.30131	0.309237	0.328413	0.258197	0.413386		0.256684	0.216524	0.238845	0.157428	0.309406	0.195699					251	291
	10	0.172535	0.0909091	0.117021	0.121795	0.160976	0.0826772		0.112299	0.0911681	0.0551181	0.0997783	0.0965347	0.111828		10	0.116935	0.100437	0.108434	0.107011	0.0942623	0.110236		0.112299	0.0911681	0.0551181	0.0997783	0.0965347	0.111828					268	281
	male															female																		271	269
Fig. 1G	EYFP+ cells															EYFP+ cells																		278	298
	bin	Vehicle							Letrozole						Fig. 1I	bin	Vehicle							Letrozole										286	288
	1	0	0.0210526	0.0337079	0.0258621	0.00833333	0		0	0	0	0	0	0		1	0.0471698	0.0813008	0.038835	0.100917	0.0245902	0.0149254		0.0136986	0.02	0.00657895	0.0191083	0.0503597	0.0505618					287	316
	2	0.0578512	0.178947	0.101124	0.0948276	0.075	0.0754717		0	0	0	0.0776699	0.0526316	0.0196078		2	0.0471698	0.113821	0.0873786	0.146789	0.0655738	0.0820896		0.0410959	0.06	0.0197368	0.0254777	0.0647482	0.0561798					278	322
	3	0.0909091	0.147368	0.0561798	0.0862069	0.108333	0.113208		0.00900901	0.0206186	0.00925926	0.0873786	0.0263158	0.0392157		3	0.141509	0.105691	0.0582524	0.100917	0.147541	0.156716		0.0753425	0.0333333	0.0657895	0.044586	0.100719	0.0898876
	4	0.123967	0.0631579	0.0449438	0.0603448	0.1	0.122642		0.0540541	0.0309278	0.037037	0.0485437	0.0701754	0.0718954		4	0.122642	0.130081	0.0776699	0.100917	0.147541	0.134328		0.0821918	0.0533333	0.0723684	0.0573248	0.107914	0.106742
	5	0.107438	0.0631579	0.0786517	0.0862069	0.075	0.0754717		0.027027	0.0206186	0.0277778	0.038835	0.0438596	0.0522876		5	0.0754717	0.0894309	0.116505	0.0642202	0.0737705	0.0746269		0.0547945	0.0733333	0.0789474	0.101911	0.158273	0.101124
	6	0.0661157	0.0736842	0.0224719	0.0689655	0.075	0.0471698		0.018018	0.0206186	0.0462963	0.0291262	0.0350877	0.0130719		6	0.0471698	0.0569106	0.038835	0.0275229	0.0491803	0.0373134		0.0890411	0.0466667	0.0657895	0.0382166	0.0647482	0.0617978
	7	0.0578512	0.0631579	0.101124	0.0431034	0.0583333	0.0660377		0.0540541	0.0824742	0.101852	0.0873786	0.105263	0.0849673		7	0.0377358	0.0243902	0.0679612	0.0733945	0.057377	0.0373134		0.0616438	0.0933333	0.144737	0.101911	0.0647482	0.101124
	8	0.0991736	0.0842105	0.247191	0.146552	0.158333	0.160377		0.126126	0.195876	0.157407	0.174757	0.254386	0.0718954		8	0.132075	0.0406504	0.0776699	0.110092	0.0819672	0.0671642		0.171233	0.126667	0.157895	0.11465	0.158273	0.117978
	9	0.289256	0.263158	0.224719	0.284483	0.125	0.245283		0.459459	0.360825	0.444444	0.407767	0.289474	0.372549		9	0.273585	0.252033	0.271845	0.247706	0.254098	0.283582		0.321918	0.373333	0.322368	0.363057	0.230216	0.269663
	10	0.107438	0.0421053	0.0898876	0.103448	0.1	0.0943396		0.252252	0.268041	0.175926	0.213592	0.254386	0.215686		10	0.0754717	0.0325203	0.0679612	0.0275229	0.0983607	0.11194		0.0890411	0.12	0.111842	0.133758	0.0935252	0.0449438
male	SOX2+ cells			female	SOX2+ cells
Fig. 1L	Vehicle	Letrozole			Vehicle	Letrozole
	152	124			152	124
	197	146			197	146
	189	104			189	104
	171	148			171	148
	201	153			201	153
	208	149			208	149
	212	140			212	140
	178	148			172	193
	195	112			169	179
	159	151			201	193
	182	119			182	172
	172	122			183	188
	188	101			169	193

## Sheet: Fig. 2
Fig. 2B	male			female		Fig. 2D	male			female
	Vehicle	Letrozole		Vehicle	Letrozole		Vehicle	Letrozole		Vehicle	Letrozole
	0.141978	0.0622141		0.405548	0.335595		0.763323	0.32398		0.293279	0.269914
	0.275781	0.0740152		0.220906	0.296848		0.486947	-0.0861751		0.313091	0.234594
	-0.0238638	0.0212332		0.486286	0.088062		0.13972	-0.107836		0.144404	0.307551
	0.466845	-0.0918068		0.289324	0.212981		0.239693	0.069439		0.246646	0.172859
	0.283124	0.0844614		0.193032	0.252646		0.165444	0.170829		0.489577	0.18944
	0.264305	0.217795		0.277076	0.207525		0.235326	0.0414193		0.537939	0.0474499
	0.213934	-0.132104		0.250789	0.163287		0.133854	0.178088		0.252284	0.308689
	0.242574	-0.03307		0.281099	-0.0083169		0.296735	0.147858		0.438563	0.472903
	0.347732	0.178666		0.187756	0.142371		0.172385	-0.248091		0.329389	0.0982519
	0.231514	0.0357572		0.194062	0.163119		0.242863	0.203555		0.282039	0.0547676
	0.441569	0.215707		0.247034	0.215264		0.260467	-0.0958117		0.297937	0.0612746
	0.480976	0.225783		0.207871	0.165735		0.0775355	-0.0020468		0.330912	0.290173
	0.1961	0.218863		0.0929737	0.285409		0.212298	0.215248		0.286715	0.137785
	0.330508	0.112594		0.210756	0.426623		0.246465	0.245048		0.193639	0.224733
	0.475679	0.012005		-0.0169572	0.437833		0.448664	-0.263621		0.0450354	0.301467
	0.348238	-0.0016246		0.444259	0.409705		0.356521	-0.318546		0.247276	0.0563657
		0.0454394		0.350063	0.0909298		0.183932	-0.215012		0.030995	0.0830026
										0.201543	0.330814
	male			female			male			female			male			female				male				female
Fig. 2E	Vehicle	Letrozole		Vehicle	Letrozole	Fig. 2G	Vehicle	Letrozole		Vehicle	Letrozole	Fig. 2H	Vehicle	Letrozole		Vehicle	Letrozole		Fig. 2I	Vehicle	Letrozole			Vehicle	Letrozole
	0.333333	0.833333		0.5	0.625		1062.83	1259.52		1178.57	893.766		302.516	174.599		119.453	97.4638			234.467	215			238.738	129.048
	0.416667	0.791667		0.583333	0.708333		1446.44	1929.24		1639.71	1267.27		469.612	103.714		92.8174	116.043			427.933	286.667			183	82.4601
	0.25	0.75		0.541667	0.666667		2392.03	1330.69		998.979	1539.32		373.949	154.611		212.842	159.681			758.2	252.4			163.919	117.216
	0.125	0.625		0.541667	0.458333		1493.23	1648.32		1217.44	1374.43		270.23	198.649		88.3521	201.981			300.267	129.067			159.691	126.85
	0.375	0.583333		0.416667	0.625		1945.93	1946.94		1728.84	1893.87		285.093	225.706		102.249	274.165			329.4	348.867			196.476	163.708
	0.458333	0.75		0.5	0.666667		1330.11	1009.46		1089.38	1503.21		254.873	125.342		87.0939	91.3229			115.467	293.333			263.227	189.232
	0.291667	0.583333		0.666667	0.583333		1409.43	1668.04		1298.28	672.384		474.28	177.887		129.593	162.597			275.6	191			107.331	132.913
	0.333333	0.708333		0.5	0.75		1873.78	2339.88		963.655	1879.81		670.235	175.862		156.228	281.802			342.467	575.733			238.697	223.743
	0.458333	0.416667		0.458333	0.5		2775.57	1836.79		1563.77	1672.4		206.894	122.054		103.005	183.359			471.533	325.733			219.432	185.244
	0.5	0.75		0.75	0.666667		1283.37	1624.16		892.604	1260.81		236.97	122.965		201.145	147.034			232.4	468.867			193.739	116.544
	0.0833333	0.333333		0.625	0.458333		1148.08	1455.99		1510.34	1378.78		517.679	133.693		219.197	139.413			228.2	138.467			183.809	107.576
	0.25	0.333333		0.333333	0.541667		1834.35	1685.22		1167.88	1147.31		127.783	118.672		118.698	206.806			348.067	538.133			160.997	137.751
	0.291667	0.791667		0.541667	0.708333		2342.26	1774.57		1783.54	1093		201.835	220.827		138.287	136.78			401.467	277.667			174.426	125.25
	0.333333	0.75		0.625	0.583333		1445.57	2372.52		1093.5	993.772		182.898	281.284		172.302	143.773			254.133	653.6			274.938	140.998
	0.375	0.708333		0.333333	0.375		1420.84	1494.47		1462.36	1390.98		159.339	184.341		136.498	125.023			252.733	484.733			164.711	221.594
	0.375	0.708333		0.375	0.75		1708.59	1553.98		1392.44	1273.6		132.901	201.999		146.414	253.189			290.867	460.2			148.436	258.39
	0.333333	0.708333		0.458333	0.625		1675.41	1894.38		1299.95	1321.13		109.833	108.01		126.46	304.635			262.667	292.467			125.176	92.801
	0.25	0.791667		0.5	0.75		1346.54	1625.52		1648.09	1382.2		209.9	124.901		147.855	226.433			252.533	493.8			115.664	119.315
	0.25	0.416667		0.583333	0.625		1335.51	1536.92		1093.13	1032.53		319.939	231.84		259.867	84.8175			263.467	198			124.252	136.554
	0.291667	0.791667		0.666667	0.875		1572.4			1529.21	897.163		172.229			282.976	103.789			265.733				96.5735	159.598
	0.291667	0.666667		0.75	0.625					1648.74	1128.45
										1379.41	1491.79
	male				female				male				female
Fig. 2J	Vehicle	Letrozole			Vehicle	Letrozole		Fig. 2L	Vehicle	Letrozole			Vehicle	Letrozole
	0.284634	0.138624			0.202565	0.144387			0.472955	0.273803			0.624612	0.517504
	0.324667	0.0537591			0.111605	0.0650691			0.321027	0.151009			0.729128	0.784894
	0.156332	0.116189			0.164087	0.0761484			0.537407	0.0747673			0.720368	0.483865
	0.180969	0.120516			0.13117	0.0922928			0.549121	0.160542			0.66023	0.634356
	0.146507	0.115929			0.113646	0.086441			0.390517	0.176152			0.583016	0.676811
	0.191617	0.124168			0.241629	0.125886			0.360165	0.1237			0.438738	0.760377
	0.336506	0.106644			0.0826714	0.197675			0.296509	0.241554			0.495645	0.344092
	0.35769	0.0751587			0.2477	0.119024			0.224326	0.0992089			0.379539	0.664434
	0.074541	0.0664495			0.140322	0.110765			0.2091	0.107109			0.533675	0.663458
	0.184648	0.0757098			0.217049	0.0924355			0.204824	0.144041			0.520727	0.579932
	0.450908	0.0918227			0.1217	0.0780224			0.227185	0.15258			0.479648	0.387439
	0.0696614	0.0704191			0.137854	0.120065			0.397567	0.0974399			0.690365	0.389112
	0.0861709	0.12444			0.0977979	0.114593			0.321616	0.162668			0.429127	0.836575
	0.126523	0.118559			0.25143	0.141882			0.343903	0.140383			0.456641	0.498406
	0.112145	0.123349			0.112634	0.159307			0.335007	0.209699			0.761289	0.816142
	0.0777841	0.129988			0.106602	0.202882			0.440263	0.179851			0.459088	0.527361
	0.0655561	0.0570158			0.0962926	0.0702437			0.462961	0.161293			0.609306	0.397897
	0.155881	0.0768377			0.0701805	0.086322			0.179042	0.281368			0.583385	0.79412
	0.239562	0.150847			0.113666	0.132251			0.447281	0.34888			0.566846	0.744513
	0.109532				0.0631524	0.177891

## Sheet: Fig. 3
Fig. 3A						Fig. 3B				Fig. 3C
							AR																	female
							Female	Male							Veh.	LET								Veh.	LET
							0.587761	10.8511							0.924041	2.8626								0.619836	2.6408
							0.507796	8.12333							1.24678	2.75733								0.7254	0.627513
							1.6269	4.23668							1.26029	2.16764								0.842952	1.91416
							1.24846	8.75406							0.774184	3.26406								1.59863	0.797243
							1.37068	3.38961							1.16585	2.23042								1.21318	1.0619
							0.658398	9.30423							0.872793	1.97061
															0.756068	2.05367
	SATB2+ cells
Fig. 3E	Vehicle	Letrozole	Letrozole+Flutamide
	261	390	201
	291	387	281
	201	329	301
	288	371	275
	239	410	351
	269	441	281
	251	374	296
	297	340	331
	SOX2+ cells					EYFP+ cells
Fig. 3F	Vehicle	Letrozole	Letrozole+Flutamide		Fig. 3G	bin	Vehicle							Letrozole							Letrozole+shAR
	201	129	183			1	0.027972	0.0382166	0.00900901	0.0165289	0.0536913	0.062069		0	0	0	0	0	0		0.182692	0.0842105	0.142857	0.103448	0.170455	0.0722892
	173	132	156			2	0.041958	0.0764331	0.045045	0.0661157	0.0872483	0.0413793		0.0121951	0	0	0	0	0.0285714		0.0769231	0.115789	0.103896	0.103448	0.0681818	0.0963855
	167	141	148			3	0.0909091	0.121019	0.0540541	0.0661157	0.107383	0.0758621		0.0243902	0.0135135	0	0	0	0.0380952		0.115385	0.0947368	0.0909091	0.172414	0.159091	0.13253
	179	132	192			4	0.153846	0.121019	0.162162	0.14876	0.154362	0.124138		0	0.0675676	0.0277778	0.0416667	0.0470588	0.0571429		0.125	0.157895	0.116883	0.0574713	0.136364	0.180723
	182	151	159			5	0.146853	0.10828	0.117117	0.0661157	0.0671141	0.0551724		0.097561	0.0135135	0.125	0.0555556	0.0470588	0.047619		0.144231	0.136842	0.116883	0.0689655	0.0795455	0.0963855
	151	113	150			6	0.0559441	0.0700637	0.0720721	0.107438	0.0469799	0.0551724		0.0853659	0.0540541	0.0833333	0.0416667	0.0588235	0.0571429		0.0769231	0.0631579	0.0519481	0.137931	0.0681818	0.0963855
	142	146	182			7	0.0559441	0.0573248	0.036036	0.107438	0.0469799	0.062069		0.0487805	0.121622	0.0416667	0.0972222	0.0352941	0.047619		0.0769231	0.0421053	0.12987	0.126437	0.113636	0.0963855
	168	132	209			8	0.0769231	0.0509554	0.0630631	0.115702	0.0469799	0.0689655		0.158537	0.189189	0.0972222	0.111111	0.117647	0.0571429		0.0769231	0.0736842	0.0519481	0.126437	0.0909091	0.108434
						9	0.202797	0.273885	0.369369	0.231405	0.302013	0.351724		0.47561	0.418919	0.583333	0.527778	0.552941	0.52381		0.0961538	0.221053	0.103896	0.0689655	0.0795455	0.0722892
						10	0.146853	0.0828025	0.0720721	0.0743802	0.0872483	0.103448		0.097561	0.121622	0.0416667	0.125	0.141176	0.142857		0.0288462	0.0105263	0.0909091	0.0344828	0.0340909	0.0481928
	MAP2+ cells					GFAP+ cells				Nestin+ cells					MAP2+ cells					GFAP+ cells				Nestin+ cells
Fig. 3H	Vehicle	Letrozole	Letrozole+Flutamide			Vehicle	Letrozole	Letrozole+Flutamide		Vehicle	Letrozole	Letrozole+Flutamide		Fig. 3I	Vehicle	Letrozole	Letrozole+Flutamide			Vehicle	Letrozole	Letrozole+Flutamide		Vehicle	Letrozole	Letrozole+Flutamide
	19.4725	54.902	31.6456			41.129	26.3566	37.1429		40.7767	18.8889	49.3671			44.4444	78.2609	23.5294			22.7273	15.3846	52.1739		43.4783	9.52381	61.5385
	31.5217	48.7805	15.7895			34.375	23.7113	42.4779		49.4737	23.9394	35.2273			26.3158	90.4762	16.129			33.3333	10.5263	44.4444		40.7407	17.6471	73.6842
	35.2273	50.4286	26.3889			32.0611	25.5102	34.0278		35.0606	33.4783	46.0163			30.4348	57.6923	42.8571			26.3158	19.0476	39.2857		55.5556	32.1429	66.6667
	24.0345	38.9718	18.8136			36.8421	28.9474	47.9452		40.5344	29.3333	35.5581			35.2941	77.2727	23.0769			39.1304	14.8148	20.8333		60.8696	15.7895	39.1304
															35.2941	76.1905	27.2727			29.1667	10.7143	26.087		54.5455	17.3913	59.0909

## Sheet: Fig. 4
	Mef2c mRNA			Bhlhe22 mRNA			Ndufaf8 mRNA			Chrac1 mRNA			Nr3c2mRNA				Cav2 mRNA
Fig. 4C	Vehicle	Letrozole		Vehicle	Letrozole		Vehicle	Letrozole		Vehicle	Letrozole		Vehicle	LET			Vehicle	LET
	0.859469	2.04582		0.529634	1.84332		0.548025	0.495216		0.808837	0.52025		0.720125	2.47942			0.720979	1.70527
	0.455856	1.49925		0.562201	1.95012		0.851493	0.300013		0.749909	0.552187		0.930655	1.86607			1.18758	1.90528
	1.66544	2.93051		1.61664	2.81272		1.05954	0.632826		1.60788	0.511784		1.45027	1.69349			0.998636	3.09513
	1.01924	3.27237		1.29153	1.81177		1.54095	0.357372		0.83337	0.384369		0.898954	1.59107			1.0928	1.32869
						MEF2C protein				MEF2C+ cells
Fig. 4E					Fig. 4F	Vehicle	Letrozole		Fig. 4G	bin	Vehicle							Letrozole
						0.782537	2.77837			1	0.0141844	0.00636943	0.015873	0	0	0		0.0212766	0.0247934	0.016	0.011583	0	0.00393701
						0.931482	1.60649			2	0	0	0	0	0.00699301	0		0.00851064	0.00413223	0.008	0.003861	0	0.011811
						0.833278	1.97172			3	0	0	0	0	0	0		0.00425532	0	0	0	0.00877193	0.011811
						0.821825	2.33581			4	0	0	0	0	0	0		0.0170213	0.0123967	0.012	0.011583	0.0219298	0.0393701
						1.63088	1.33411			5	0.0638298	0.089172	0.031746	0.0736196	0.0559441	0.033557		0.0893617	0.103306	0.076	0.123552	0.166667	0.110236
										6	0.0496454	0.0828026	0.0793651	0.0858896	0.0559441	0.0469799		0.102128	0.107438	0.124	0.111969	0.201754	0.165354
										7	0.177305	0.140127	0.126984	0.122699	0.132867	0.0939597		0.174468	0.161157	0.184	0.127413	0.232456	0.192913
										8	0.219858	0.22293	0.216931	0.269939	0.384615	0.315436		0.225532	0.239669	0.244	0.239382	0.337719	0.350394
										9	0.347518	0.33758	0.312169	0.331288	0.524476	0.355705		0.276596	0.260331	0.268	0.266409	0.25	0.283465
										10	0.12766	0.121019	0.216931	0.0920245	0.0909091	0.14094		0.0808511	0.0867769	0.068	0.0810811	0.0921053	0.0472441
	MEF2C+ cells				Mef2c mRNA											MEF2C protein
Fig. 4H	Vehicle	Letrozole		Fig. 4I	Vehicle	DHT+Veh.	DHT+FT		Fig. 4J						Fig. 4	Vehicle	DHT+Veh.	DHT+FT
	141	235			1.07484	1.72907	1.14076									1.11877	1.71159	0.906037
	157	242			0.929235	1.93187	1.04247									0.890554	1.95027	1.01615
	189	250			0.99593	1.68179	1.31951									0.960207	2.35892	1.65548
	231	273			1.07677	1.23114										1.03047	1.9514	1.26465
	201	206			0.838978	1.53688
	159	253			1.08426	1.24833
	179	299			1.12509	2.23457
	147	309			0.846769	2.07053
					1.02814	1.75321

## Sheet: Fig.5
	EYFP+ cells
Fig. 5B	bin	Veh.+shCont					Veh.+shMef2c					LET+shCont					LET+shMef2c
	1	0.0465116	0.113402	0.0574713	0.0963855		0.138462	0.0775194	0.173228	0.0756302		0	0	0	0		0.0530974	0.0833333	0.0416667	0.0472973
	2	0.0930233	0.206186	0.137931	0.168675		0.146154	0.170543	0.133858	0.092437		0.00641026	0	0	0		0.150442	0.152778	0.158333	0.162162
	3	0.139535	0.154639	0.103448	0.0963855		0.138462	0.255814	0.149606	0.184874		0.0192308	0.036036	0.0142857	0.00925926		0.132743	0.131944	0.0916667	0.0878378
	4	0.0930233	0.0412371	0.103448	0.108434		0.2	0.139535	0.11811	0.159664		0.0320513	0.0630631	0.0642857	0.037037		0.106195	0.0486111	0.05	0.0743243
	5	0.0581395	0.0412371	0.0344828	0.0481928		0.0846154	0.139535	0.102362	0.176471		0.0384615	0.036036	0.0571429	0.0277778		0.0707965	0.0486111	0.158333	0.114865
	6	0.0348837	0.0618557	0.0229885	0.0361446		0.0923077	0.0620155	0.0472441	0.117647		0.0769231	0.0810811	0.0642857	0.0462963		0.0973451	0.0416667	0.0666667	0.0675676
	7	0.0348837	0.0206186	0.103448	0.0361446		0.0538462	0.0387597	0.149606	0.0336135		0.121795	0.135135	0.171429	0.101852		0.0442478	0.0625	0.0666667	0.0472973
	8	0.104651	0.0618557	0.137931	0.108434		0.0615385	0.0387597	0.0866142	0.142857		0.224359	0.162162	0.157143	0.157407		0.150442	0.159722	0.158333	0.162162
	9	0.325581	0.268041	0.241379	0.253012		0.0846154	0.0387597	0.023622	0.0168067		0.403846	0.441441	0.371429	0.444444		0.115044	0.222222	0.183333	0.202703
	10	0.0697674	0.0309278	0.0574713	0.0481928		0	0.0387597	0.015748	0		0.0769231	0.0450451	0.1	0.175926		0.079646	0.0486111	0.025	0.0337838
Fig. 5C
	MAP2 protein				GFAP protein				Nestin protein
Fig. 5D	Veh.+shCont	DHT+shCont	DHT+shMef2c	Fig. 5E	Veh.+shCont	DHT+shCont	DHT+shMef2c	Fig. 5F	Veh.+shCont	DHT+shCont	DHT+shMef2c
	0.947311	1.97403	1.39341		1.09274	0.711631	0.824721		1.12747	0.372049	0.733733
	0.688259	1.60734	1.05224		0.847007	0.393944	0.838818		0.898651	0.379296	0.941742
	1.13232	1.65208	1.13952		0.993672	0.617025	0.820671		0.868965	0.691698	0.993003
	1.23211	1.31724	1.06574		1.06658	0.739394	1.16831		1.10492	0.640435	0.783588
	MAP2				GFAP				Nestin
Fig. 5G	Veh.+shCont	DHT+shCont	DHT+shMef2c		Veh.+shCont	DHT+shCont	DHT+shMef2c		Veh.+shCont	DHT+shCont	DHT+shMef2c
	35	81.8182	14.2857		36.3636	13.0435	26.3158		69.5652	9.52381	61.5385
	31.5789	77.7778	21.0526		33.3333	19.0476	23.0769		35.7143	17.6471	41.6667
	21.7391	58.6207	20.8333		26.3158	14.2857	33.3333		52.9412	7.14286	66.6667
	19.2308	79.1667	11.1111		39.1304	8.33333	35.7143		47.3684	15.7895	52.381

## Sheet: Fig. 6
Fig. 6B									Fig. 6C
		IgG			AR						IgG			AR
	Vehicle	0.0558606	1.22942	1.71472	0.281265	0.014082	0.517632			Vehicle	1.04186	0.958711	0.999424	0.0947323	0.179244	0.170755
	DHT	1.52973	0.780936	0.689335	0.550953	1.10191	1.22264			DHT	1.11528	1.17888	0.705839	9.25351	7.67411	6.06287
Fig. 6D									Fig. 6E
		IgG			AR						IgG			MeCP2
	Vehicle	1.09399	1.09399	0.812025	0.108819	0.0717936	0.133972			Vehicle	0.5596	1.75621	0.684189	1.82766	0.185565	2.34567
	DHT	0.730006	1.30675	0.963248	3.605	5.54044	7.06162			DHT	1.15865	0.608125	1.23323	9.91766	9.84916	7.83536
Fig. 6F									Fig. 6G
		IgG			MeCP2						IgG			AR
	Vehicle	0.374719	2.38482	0.240462	2.73208	1.60214	2.18859			Vehicle	1.08287	1.74698	0.170148	0.806642	0.133046	5.65685
	DHT	1.25069	0.733428	1.01588	1.18099	2.77022	1.87905			DHT	0.542868	0.822833	1.6343	9.84916	8.57419	17.2677
Fig. 6H
		IgG			MeCP2				Fig. 6I	Cont	AR	MeCP2	AR+MeCP2
	Vehicle	1.42209	0.696414	0.881491	0.336808	0.327598	0.271684			0.979534	1.30014	1.47391	2.24504
	DHT	0.817955	1.22272	0.959326	3.16017	2.42839	2.75108			0.931737	1.52082	1.44969	2.0938
										0.975129	1.40278	1.38984	1.99592
										1.1136	1.64862	1.1562	1.8468
Fig. 6J		MeCP2+AR				Cont				Fig. 6K							Fig. 6L
	ΔMe-ΔAR	1.20237	0.747822	1.02448		0.806294	0.922585	0.960372
	ΔMeCP2	1.66788	1.57058	0.84161		0.991897	1.02907	0.958521
	ΔAR	3.44554	3.20004	2.94366		1.42086	1.56343	1.68505
	WT	3.63143	2.59794	2.49452		1.3172	1.22108	1.31777
Fig. 6M		Cont				MeCP2+AR					Fig. 6N		Vehicle				DHT
	DHT	0.873517	1.1112	1.1964	0.81888	2.69804	1.51884	1.48045	2.02523			AR+MeCP2	0.970662	1.04841	0.926131	1.0548	1.72881	1.50221	1.8322	1.57923
	DHT+flu	1.36662	0.731531	0.928011	1.30489	1.36668	1.00924	0.822678	1.4763			AR+Control	1.19813	1.06693	1.3512	1.07803	1.62541	1.19532	1.22443	1.23363
												AR+shMeCP2	1.22501	1.01851	1.13626	1.0042	1.2995	0.731514	1.33581	0.963088
Fig. 6O
EYFP+ cells
bin	Corn oil				shMeCP2				Letrozole				Letrozole+shmecp2
1	0.0390625	0.0583942	0.028777	0.0366972	0.0674157	0.0765027	0.0510949	0.0946746	0	0	0	0	0.0610687	0.0550459	0.0336134	0.0352113
2	0.0859375	0.0437956	0.0431655	0.0550459	0.106742	0.0601093	0.0583942	0.0887574	0.0210526	0	0	0	0.0839695	0.0825688	0.0672269	0.084507
3	0.109375	0.0656934	0.0791367	0.119266	0.0955056	0.125683	0.124088	0.0828402	0.0210526	0.026087	0.0438596	0.010101	0.0916031	0.0825688	0.109244	0.0704225
4	0.09375	0.0948905	0.122302	0.174312	0.157303	0.114754	0.138686	0.130178	0.0631579	0.0695652	0.0350877	0.030303	0.160305	0.137615	0.142857	0.126761
5	0.0703125	0.0875912	0.0863309	0.0825688	0.101124	0.120219	0.138686	0.159763	0.0421053	0.0434783	0.0526316	0.0505051	0.114504	0.110092	0.10084	0.133803
6	0.0625	0.0656934	0.0647482	0.0550459	0.0955056	0.114754	0.0583942	0.0887574	0.0842105	0.0869565	0.105263	0.040404	0.0687023	0.0458716	0.0504202	0.0774648
7	0.0390625	0.0437956	0.0791367	0.0917431	0.0730337	0.0983607	0.10219	0.0946746	0.0631579	0.0956522	0.149123	0.0909091	0.0458015	0.0366972	0.0588235	0.0704225
8	0.0546875	0.0656934	0.0935252	0.0642202	0.0955056	0.0765027	0.153285	0.0769231	0.126316	0.104348	0.114035	0.0505051	0.0916031	0.146789	0.12605	0.0985915
9	0.34375	0.372263	0.345324	0.284404	0.146067	0.169399	0.138686	0.142012	0.452632	0.46087	0.429825	0.555556	0.236641	0.266055	0.268908	0.246479
10	0.101562	0.10219	0.057554	0.0366972	0.0617978	0.0437158	0.0364964	0.0414201	0.126316	0.113043	0.0701754	0.171717	0.0458015	0.0366972	0.0420168	0.056338

## Sheet: Fig. 7
Fig. 7A								Fig. 7B	MEF2C+ cells															Fig. 7C
					WT	TG			bin	WT							TG								WT	TG
					0.615367	1.36111			1	0	0.00606061	0.00641026	0	0.00581395	0.00840336		0.0104167	0.00967742	0.00342466	0.00347222	0	0.0127796			141	288
					0.615658	1.13652			2	0	0	0.00641026	0	0	0		0.00694444	0.00322581	0	0	0.00363636	0			165	310
					0.719138	1.21416			3	0	0	0	0.00689655	0	0		0.00694444	0	0	0.0138889	0.0181818	0			156	292
					0.554848	1.83766			4	0	0.00606061	0	0	0	0		0.0104167	0.0225806	0.0308219	0.0347222	0.0109091	0.0191693			201	279
					0.458373	1.47053			5	0.0851064	0.030303	0.0448718	0.0413793	0.0348837	0.0336134		0.0416667	0.0903226	0.0821918	0.0972222	0.112727	0.0734824			149	301
					0.524518	1.70929			6	0.0780142	0.0969697	0.0576923	0.0965517	0.0581395	0.134454		0.0798611	0.109677	0.140411	0.100694	0.149091	0.0990415			187	258
									7	0.148936	0.139394	0.121795	0.103448	0.127907	0.159664		0.177083	0.229032	0.164384	0.194444	0.185455	0.217252
									8	0.234043	0.248485	0.301282	0.282759	0.296512	0.235294		0.305556	0.219355	0.246575	0.201389	0.221818	0.242812
									9	0.297872	0.357576	0.262821	0.337931	0.302326	0.327731		0.267361	0.190323	0.226027	0.274306	0.229091	0.252396
									10	0.156028	0.115152	0.198718	0.131034	0.151163	0.10084		0.09375	0.125806	0.106164	0.0798611	0.112727	0.0830671
	EYFP+ cells
Fig. 7E	bin	WT+Vehicle							TG+Vehicle							TG+shMef2c
	1	0.0390625	0.0583942	0.028777	0.0366972	0.0137931	0.00769231		0	0	0	0	0	0		0.0610687	0.0550459	0.0336134	0.0633803	0.0254237	0.0384615
	2	0.0859375	0.0437956	0.0431655	0.0550459	0.0827586	0.0230769		0.0210526	0	0	0	0.00840336	0.0190476		0.0839695	0.0825688	0.0672269	0.0492958	0.101695	0.0576923
	3	0.109375	0.0656934	0.0791367	0.119266	0.0965517	0.0846154		0.0210526	0.026087	0.0438596	0.010101	0.0756303	0.0190476		0.0916031	0.0825688	0.109244	0.056338	0.0847458	0.0576923
	4	0.09375	0.0948905	0.122302	0.174312	0.144828	0.107692		0.0631579	0.0695652	0.0350877	0.030303	0.0840336	0.0666667		0.160305	0.137615	0.142857	0.15493	0.228814	0.134615
	5	0.0703125	0.0875912	0.0863309	0.0825688	0.0689655	0.1		0.0421053	0.0434783	0.0526316	0.0505051	0.10084	0.0761905		0.114504	0.110092	0.10084	0.119718	0.0847458	0.134615
	6	0.0625	0.0656934	0.0647482	0.0550459	0.0758621	0.0692308		0.0842105	0.0869565	0.105263	0.040404	0.0672269	0.12381		0.0687023	0.0458716	0.0504202	0.0774648	0.0338983	0.0576923
	7	0.0390625	0.0437956	0.0791367	0.0917431	0.062069	0.1		0.0631579	0.0956522	0.149123	0.0909091	0.0672269	0.104762		0.0458015	0.0366972	0.0588235	0.0140845	0.0762712	0.0384615
	8	0.0546875	0.0656934	0.0935252	0.0642202	0.0965517	0.0692308		0.126316	0.104348	0.114035	0.0505051	0.0588235	0.0952381		0.0916031	0.146789	0.12605	0.15493	0.0762712	0.134615
	9	0.34375	0.372263	0.345324	0.284404	0.268966	0.369231		0.452632	0.46087	0.429825	0.555556	0.487395	0.4		0.236641	0.266055	0.268908	0.295775	0.211864	0.278846
	10	0.101562	0.10219	0.057554	0.0366972	0.0896552	0.0692308		0.126316	0.113043	0.0701754	0.171717	0.0504202	0.0952381		0.0458015	0.0366972	0.0420168	0.0140845	0.0762712	0.0673077
Fig. 7F
	MAP2					GFAP					Nestin
Fig. 7G	WT+shCont	MeCP2Tg1+shCont	MeCP2Tg1+shmef2c		Fig. 7H	WT+shCont	MeCP2Tg1+shCont	MeCP2Tg1+shmef2c		Fig. 7I	WT+shCont	MeCP2Tg1+shCont	MeCP2Tg1+shmef2c
	0.739075	1.99891	0.999613			1.10082	0.326048	0.727629			1.18169	0.685816	0.834785
	1.06256	1.60255	1.26111			0.995135	0.729835	0.786035			0.937614	0.804361	1.03126
	1.02129	2.22824	1.2081			0.873512	0.635371	0.836489			0.823021	0.556291	0.859379
	1.17708	1.25003	1.03134			1.03053	0.505279	0.885504			1.05767	0.603755	0.916089
	MAP2					GFAP					Nestin
Fig. 7K	WT+shCont	MeCP2Tg1+shCont	MeCP2Tg1+shmef2c		Fig. 7L	WT+shCont	MeCP2Tg1+shCont	MeCP2Tg1+shmef2c		Fig. 7M	WT+shCont	MeCP2Tg1+shCont	MeCP2Tg1+shmef2c
	22.7273	64.7059	15.3846			36.3636	16.6667	38.4615			45.8333	16.6667	67.8571
	23.0769	84.2105	18.75			31.25	6.66667	33.3333			47.3684	7.14286	57.1429
	31.5789	85.7143	10.5263			26.6667	21.4286	26.6667			38.8889	18.1818	36.8421
	26.9231	84.6154	13.6364			29.4118	18.5185	28.5714			57.1429	16	46.1538

## Sheet: Fig. 8
	MEF2C+ cells
Fig. 8B	bin	WT+Vehicle							TG+Vehicle							TG+FT						Fig. 8C
	1	0.00649351	0.00625	0.0125	0	0.00578035	0.0238095		0.015873	0.00687285	0.00680272	0.00653595	0	0.00986842		0.0160428	0.00502513	0.00546448	0	0.011976	0.0216216		WT+Vehicle	TG+Vehicle	TG+FT
	2	0	0	0	0	0.00578035	0		0	0.00687285	0	0.00326797	0	0		0.0106952	0.0150754	0.00546448	0.00966184	0	0.0216216		154	315	187
	3	0	0	0	0	0	0		0.0031746	0	0	0.00653595	0	0		0.00534759	0	0	0	0	0.0108108		160	291	199
	4	0	0	0	0	0	0		0.0253968	0.0171821	0.0204082	0.0326797	0.0218978	0.0131579		0.00534759	0.0201005	0.010929	0.0144928	0.0179641	0.00540541		160	294	183
	5	0.0584416	0.03125	0.0625	0.0844156	0.0346821	0.0396825		0.0761905	0.0859107	0.0714286	0.0947712	0.0693431	0.0855263		0.0695187	0.0753769	0.0491803	0.0917874	0.0598802	0.0324324		154	306	207
	6	0.0844156	0.0875	0.1	0.0974026	0.121387	0.0793651		0.101587	0.0996564	0.122449	0.101307	0.131387	0.115132		0.0802139	0.105528	0.0983607	0.0917874	0.143713	0.0756757		173	274	167
	7	0.123377	0.13125	0.15625	0.162338	0.0982659	0.150794		0.2	0.178694	0.207483	0.169935	0.222628	0.194079		0.112299	0.125628	0.15847	0.149758	0.131737	0.102703		126	304	185
	8	0.188312	0.26875	0.23125	0.233766	0.283237	0.246032		0.247619	0.250859	0.234694	0.235294	0.222628	0.210526		0.203209	0.20603	0.185792	0.207729	0.185629	0.264865		179	243	189
	9	0.37013	0.325	0.30625	0.285714	0.271676	0.309524		0.215873	0.213058	0.241497	0.254902	0.218978	0.210526		0.352941	0.341709	0.31694	0.342995	0.323353	0.313514		183	255	211
	10	0.168831	0.15	0.13125	0.136364	0.179191	0.150794		0.114286	0.140893	0.0952381	0.0947712	0.113139	0.161184		0.144385	0.105528	0.169399	0.0917874	0.125749	0.151351
Fig. 8D	SATB2				Fig. 8E	SOX2
	WT+Vehicle	TG+Vehicle	TG+FT			WT+Vehicle	TG+Vehicle	TG+FT
	282	434	279			231	183	167
	267	369	287			193	154	193
	277	373	299			209	138	149
	299	382	311			184	139	172
	310	330	281			198	150	182
	283	318	289			201	162	159
	268	353	271			173	141	221
						163	121	201
Fig. 8F	WT	TG			Fig. 8G	WT	TG			Fig. 8H	WT	TG
	Vehicle	Vehicle	Letrozole			Vehicle	Vehicle	Letrozole			Vehicle	Vehicle	Letrozole
	0.534116	0.0371414	0.289353			0.24778	-0.019334	0.221954			0.291667	0.875	0.416667
	0.321446	0.0312664	0.279029			0.177286	-0.0856368	0.135288			0.458333	0.958333	0.5
	0.187088	0.0431698	0.124939			0.171895	-0.281897	0.291819			0.625	0.791667	0.708333
	0.341068	-0.0673577	0.081059			0.382482	0.162263	0.3048			0.25	0.75	0.5
	0.119653	-0.134887	0.0742378			0.0872774	0.0155205	0.16046			0.583333	0.416667	0.5
	0.304341	0.0231536	0.0943979			0.176906	0.142431	0.192144			0.5	0.666667	0.75
	0.348091	-0.0395116	-0.0991949			0.339501	-0.000223086	0.361462			0.666667	0.625	0.375
	0.23233	0.103099	0.347687			0.110087	-0.309411	0.0944514			0.25	0.875	0.291667
	0.332851	0.041495	0.186725			0.32938	0.0558287	-0.21617			0.416667	0.958333	0.458333
	0.445301	-0.00654526	0.178051			0.298438	-0.237617	-0.0663336			0.458333	0.833333	0.666667
	0.133732	0.113706	0.161243			0.146786	0.0287031	-0.246302			0.208333	0.75	0.541667
	0.30338	0.0371489	0.10049			0.120269	-0.00316624	0.195546			0.166667	0.791667	0.75
	0.226755	0.165185	0.319991			0.164082	-0.338917	-0.184423			0.708333	0.708333	0.375
	0.230385	0.255074	0.0436659			0.0956168	-0.261664	0.137523			0.333333	0.875	0.416667
	0.230623	0.0780485	0.306508			0.153024	0.218488	-0.0204203			0.25	0.916667	0.458333
	0.343389	-0.0209253	0.172606			0.0860449	-0.00300516	0.00149989			0.458333	0.875	0.333333
	0.274138	-0.125051	-0.030331			0.154281	0.0470842	0.494667			0.416667	0.75	0.5
	0.175849	-0.093941	0.187758			0.165803	-0.161975	0.112115			0.375	0.708333	0.291667
											0.333333	0.791667	0.541667
											0.25	0.958333	0.458333
											0.75	0.416667	0.625
Fig. 8j	WT	TG			Fig. 8K	WT	TG			Fig. 8M	WT	TG
	Vehicle	Vehicle	Letrozole			Vehicle	Vehicle	Letrozole			Vehicle	Vehicle	Letrozole
	0.534116	0.0371414	0.289353			0.249022	0.0879798	0.205003			0.481639	0.0869368	0.229687
	0.321446	0.0312664	0.279029			0.128987	0.117788	0.188137			0.529903	0.15612	0.362623
	0.187088	0.0431698	0.124939			0.164139	0.0772426	0.114695			0.48247	0.106265	0.338487
	0.341068	-0.0673577	0.081059			0.197979	0.179558	0.155956			0.411374	0.206309	0.1886
	0.119653	-0.134887	0.0742378			0.102544	0.0789083	0.194904			0.276037	0.221748	0.23457
	0.304341	0.0231536	0.0943979			0.174954	0.129027	0.203153			0.182678	0.0687736	0.384649
	0.348091	-0.0395116	-0.0991949			0.32012	0.0647123	0.161769			0.347063	0.150471	0.339393
	0.23233	0.103099	0.347687			0.230815	0.152165	0.17345			0.437289	0.084338	0.318873
	0.332851	0.041495	0.186725			0.238927	0.108613	0.130774			0.162714	0.130485	0.094859
	0.445301	-0.00654526	0.178051			0.220175	0.0600966	0.159598			0.502278	0.18062	0.162582
	0.133732	0.113706	0.161243			0.214549	0.110024	0.120633			0.497196	0.0890182	0.508586
	0.30338	0.0371489	0.10049			0.160552	0.0858585	0.145556			0.358427	0.124102	0.34218
	0.226755	0.165185	0.319991			0.176026	0.0591298	0.215829			0.389389	0.165341	0.334538
	0.230385	0.255074	0.0436659			0.151643	0.0699107	0.0246607			0.43474	0.233903	0.354218
	0.230623	0.0780485	0.306508			0.293093	0.0899456	0.210253			0.456246	0.128702	0.127068
	0.343389	-0.0209253	0.172606			0.227428	0.0592709	0.111701			0.475064	0.110326	0.208926
	0.274138	-0.125051	-0.030331			0.161549	0.164107	0.139604			0.492803	0.168936	0.369054
	0.175849	-0.093941	0.187758			0.201259	0.106867	0.188135			0.500039	0.295719	0.115265
						0.188627	0.174775	0.169591			0.411638	0.175045	0.211843
						0.167578	0.103241	0.226089			0.2515	0.38726	0.158481

## Sheet: Fig. S1
Fig. S1A																								AGD
	E2 level（ng/mL）									Fig. 1B	P5
	E14.5			E16.5			E18.5				Vehicle	Letrozole
	Vehicle	Letrozole		Vehicle	Letrozole		Vehicle	Letrozole			4.336	4.579
	20.7519	16.8497		23.1982	28.0175		27.7348	17.433			4.291	4.481
	23.8538	22.6362		28.0649	23.6474		18.8836	21.051			4.289	4.292
	20.4559	24.4396		24.5242	19.4093		24.02	19.0926			4.119	4.427
	26.1778	17.8296		27.269	28.5422		19.3739	19.8374			4.229	4.391
	20.3423	23.3456					20.4932	24.4583			4.319	4.537
							23.9871	26.2849			4.227	4.319
							21.3944	20.911			4.292	4.297
							25.3892	23.8393			4.178	4.612
							19.8993	24.9923			4.289	4.289
							25.8935	25.2903
	Pup number				body weight (g)
Fig. 1C	P0			Fig. 1F	male		female
	Vehicle	Letrozole			Vehicle	Letrozole	Vehicle	Letrozole
	8	8			0.886	1.109	0.702	0.8944
	9	7			0.8954	0.901	0.823	0.7833
	7	6			0.974	0.891	0.874	0.7103
	10	8			1.012	0.795	0.921	0.6934
	11	9			1.004	0.969	0.832	0.8023
	8	11			0.891	0.893	0.779	0.7483
	7	10			0.799	1.194	0.82	0.7397
	8	7			1.002	0.792	0.741	0.7383
	8	9
	9	6
	7	10
	8	9
	7	8
	8	7
	7	9
	8	11
	11	10
	11	7
	10	7

## Sheet: Fig. S2
																																male			female
	CTIP2+ cells	male														CTIP2+ cells	female															CTIP2+ cells			CTIP2+ cells
Fig. S2B	bin	Vehicle							Letrozole							bin	Vehicle							Letrozole							Fig. S1f2C	Vehicle	Letrozole		Vehicle	Letrozole
	1	0	0	0	0	0	0		0	0	0	0	0	0		1	0	0	0	0	0	0		0	0	0	0	0	0			117	106		139	210
	2	0	0	0	0	0	0		0	0	0	0	0	0		2	0	0	0	0	0	0		0	0	0	0	0	0			130	148		157	259
	3	0	0	0	0	0	0		0	0	0	0	0	0		3	0	0	0	0	0	0		0	0	0	0	0	0			125	203		181	175
	4	0	0	0	0	0	0		0.207547	0	0.192118	0.114286	0.0381679	0.176101		4	0.0248447	0.0794702	0	0.0112994	0.0220588	0.0514706		0.207547	0	0.192118	0.114286	0.0381679	0.176101			135	194		135	139
	5	0	0.161538	0.024	0	0.0761905	0.105263		0.264151	0.277027	0.251232	0.25	0.167939	0.257862		5	0.298137	0.245033	0.269565	0.293785	0.213235	0.272059		0.264151	0.277027	0.251232	0.25	0.167939	0.257862			139	144		124	193
	6	0.222222	0.207692	0.232	0.167939	0.304762	0.142857		0.292453	0.222973	0.192118	0.264286	0.320611	0.18239		6	0.192547	0.271523	0.182609	0.19209	0.205882	0.154412		0.292453	0.222973	0.192118	0.264286	0.320611	0.18239			132	202		119	211
	7	0.205128	0.223077	0.32	0.274809	0.209524	0.18797		0.235849	0.236486	0.261084	0.207143	0.335878	0.245283		7	0.279503	0.165563	0.286957	0.20904	0.301471	0.205882		0.235849	0.236486	0.261084	0.207143	0.335878	0.245283			169	140		173	201
	8	0.418803	0.261538	0.344	0.389313	0.295238	0.345865		0	0.135135	0.103448	0.128571	0	0.0880503		8	0.180124	0.205298	0.182609	0.276836	0.242647	0.279412		0	0.135135	0.103448	0.128571	0	0.0880503			133	241		194	151
	9	0.153846	0.146154	0.08	0.167939	0.114286	0.218045		0	0.128378	0	0.0357143	0.137405	0.0503145		9	0.0248447	0.0331126	0.0782609	0.0169492	0.0147059	0.0367647		0	0.128378	0	0.0357143	0.137405	0.0503145			99	199		199	135
	10	0	0	0	0	0	0		0	0	0	0	0	0		10	0	0	0	0	0	0		0	0	0	0	0	0			109	179		173	149
																																113	193		184	193
																																138	168		173	188
																																119	159		193	179
																																124	169
																																male				female
	TBR1+ cells	male														TBR1+ cells	male															TBR1+ cells				TBR1+ cells
Fig. S2E	bin	Vehicle							Letrozole						Fig. S2E	bin	Vehicle							Letrozole							Fig. S2F	Vehicle	Letrozole		Fig. S2F	Vehicle	Letrozole
	1	0	0	0	0	0	0		0	0	0	0	0	0		1	0	0	0	0	0	0.00806452		0	0	0	0	0	0			124	129			118	149
	2	0	0	0	0	0	0		0	0	0	0	0	0		2	0	0	0	0	0	0.016129		0	0	0	0	0	0			133	198			87	165
	3	0	0	0	0	0	0		0	0	0	0	0	0		3	0	0	0	0	0	0.0241935		0	0	0	0	0	0			133	158			151	191
	4	0	0	0	0	0	0		0.271318	0.156566	0.113924	0.15894	0.116788	0.198953		4	0.00107476	0.00137018	0.00113387	0.00226083	0	0.0322581		0.0508475	0	0.0192308	0	0.0121951	0.0444444			141	151			132	102
	5	0.0322581	0.0977444	0.0977444	0.0992908	0.0544218	0.0787402		0.434109	0.40404	0.481013	0.456954	0.452555	0.429319		5	0.00453786	0.00393926	0.00439374	0.00487863	0	0.0403226		0.446328	0.476471	0.442308	0.468927	0.439024	0.433333			112	148			101	99
	6	0.41129	0.383459	0.503759	0.489362	0.52381	0.385827		0.294574	0.383838	0.373418	0.357616	0.357664	0.356021		6	0.00352281	0.0030829	0.00347247	0.00404569	0	0.0483871		0.293785	0.352941	0.339744	0.293785	0.286585	0.322222			125	167			97	129
	7	0.491935	0.413534	0.360902	0.382979	0.29932	0.496063		0	0.0555556	0.0316456	0.0264901	0.0729927	0.0157068		7	0.000298543	0.000228363	0.000708667	0.000178486	0	0.0564516		0.20904	0.170588	0.198718	0.237288	0.262195	0.2			134	151			138	171
	8	0.0645161	0.105263	0.037594	0.0283688	0.122449	0.0393701		0	0	0	0	0	0		8	0	0	0	0	0	0.0645161		0	0	0	0	0	0			128	129			129	82
	9	0	0	0	0	0	0		0	0	0	0	0	0		9	0	0	0	0	0	0.0725806		0	0	0	0	0	0			127	169			103	149
	10	0	0	0	0	0	0		0	0	0	0	0	0		10	0	0	0	0	0	0.0806452		0	0	0	0	0	0			110	159			142	115
																																127	185			130	143
																																128	193			98	103
	SATB2+ cells																																			103	118
	male			female
Fig. S2I	Vehicle	Letrozole		Vehicle	Letrozole
	136	231		133	184
	149	213		189	151
	146	272		154	231
	141	273		173	199
	179	231		188	234
	183	203		198	179
	121	212		183	211
	201	243		211	149
	male				female				male				female
	cortical width (mm)				cortical width (mm)				cortical length (mm)				cortical length (mm)						cortical thickness (μm)
Fig. S2K	E18.5			Fig. S2K	E18.5			Fig. S2K	E18.5			Fig. S2K	E18.5					Fig. S2M	E18.5
	Vehicle	Letrozole			Vehicle	Letrozole			Vehicle	Letrozole			Vehicle	Letrozole					Vehicle	Letrozole
	6.701	6.923			6.011	6.031			5.193	4.924			5.031	4.985					589	549
	6.912	6.829			6.261	6.252			4.984	4.948			4.634	4.732					603	562
	6.123	6.293			6.123	6.013			5.394	5.193			5.214	5.294					608	591
	6.239	6.499			6.239	6.499			5.013	4.892			5.136	4.931					619	632
	6.293	6.845			6.213	6.845			4.923	5.092			4.634	5.393					592	619
	6.302	6.597			6.334	6.597			5.291	5.104			5.043	5.022					578	605
	6.839	6.598			6.793	6.529			4.833	4.92			4.943	4.892					541	592
	6.592	6.202			6.692	6.238			5.324	4.892			5.429	4.821					630	594
																			613	582
																			622	591
																			571	602
																			582	593
																			585	559
																			594	583
																			606	572

[truncated: 9 more sheets: Fig. S3, Fig. S4, Fig. S5, Fig. S6, Fig. S9, Fig. S10, Fig. S11, Fig. S12, Fig. S13]
